# Supplementary material for: European Respiratory Society statement on long COVID follow-up
Source: PubMed Central journal article supplement — Eur Respir J. 2022 Aug 4;60(2):2102174. doi: 10.1183/13993003.02174-2021 (PMC9349784; doi:10.1183/13993003.02174-2021), 2022-08-04

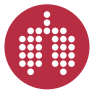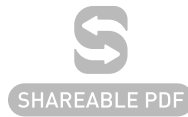

# European Respiratory Society statement on long COVID follow-up

Katerina M. Antoniou<sup>1</sup>, Eirini Vasarmidi<sup>1,2,16</sup>, Anne-Marie Russell<sup>3,16</sup>, Claire Andrejak<sup>4</sup>, Bruno Crestani<sup>5,6</sup>, Marion Delcroix<sup>6</sup>, Anh Tuan Dinh-Xuan<sup>7</sup>, Venerino Poletti<sup>8,9</sup>, Nicola Sverzellati<sup>10</sup>, Michele Vitacca<sup>11</sup>, Martin Witzenrath<sup>12</sup>, Thomy Tonia<sup>13</sup> and Antonio Spanevello<sup>14,15</sup>

<sup>1</sup>Laboratory of Molecular and Cellular Pneumology, Dept of Respiratory Medicine, School of Medicine, University of Crete, Heraklion, Greece. <sup>2</sup>Université Paris Cité, Inserm, Physiopathologie et Épidémiologie des Maladies Respiratoires, Paris, France. <sup>3</sup>College of Medicine and Health, University of Exeter, Exeter, UK. <sup>4</sup>Service de Pneumologie, CHU Amiens-Picardie, UR 4294 AGIR, Université Picardie Jules-Verne, Amiens, France. <sup>5</sup>Centre de Référence des Maladies Pulmonaires Rares (site Constitutif), AP-HP, Service de Pneumologie, Hôpital Bichat, Paris, France. <sup>6</sup>Dept of Pneumology, KU Leuven University Hospitals Leuven, Leuven, Belgium. <sup>7</sup>AP-HP Centre, Hôpital Cochin, Respiratory Physiology Unit, Thoracic Diseases Dept, Université de Paris, Paris, France. <sup>8</sup>Pulmonology Unit, Thoracic Diseases Dept, G.B. Morgagni Hospital, Forlì, Italy. <sup>9</sup>Dept of Respiratory Diseases and Allergy, Aarhus University Hospital, Aarhus, Denmark. <sup>10</sup>Division of Radiology, Dept of Surgical Sciences, University Hospital of Parma, Parma, Italy. <sup>11</sup>Istituti Clinici Scientifici Maugeri IRCCS, Respiratory Rehabilitation of the Institute of Lumezzane, Brescia, Italy. <sup>12</sup>Dept of Internal Medicine/ Infectious Diseases and Respiratory Medicine, Charité – Universitätsmedizin Berlin, Berlin, Germany. <sup>13</sup>Institute of Social and Preventive Medicine, University of Bern, Bern, Switzerland. <sup>14</sup>Dept of Medicine and Surgery, University of Insubria, Varese, Italy. <sup>15</sup>Dept of Medicine and Cardiopulmonary Rehabilitation, Maugeri Care and Research Institute, IRCCS Tradate, Varese, Italy. <sup>16</sup>These authors contributed equally.

Corresponding author: Katerina M. Antoniou ([kantoniou@uoc.gr](mailto:kantoniou@uoc.gr))

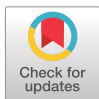

Shareable abstract (@ERSpublications)

**Follow-up care of patients infected with SARS-CoV-2 is crucial and may improve their quality of life. More evidence and research is emerging to understand the causes, mechanisms and risks of long COVID consequences.** <https://bit.ly/3J1WMWY>

**Cite this article as:** Antoniou KM, Vasarmidi E, Russell A-M, *et al.* European Respiratory Society statement on long COVID follow-up. *Eur Respir J* 2022; 60: 2102174 [DOI: 10.1183/13993003.02174-2021].

This single-page version can be shared freely online.

## Abstract

Patients diagnosed with coronavirus disease 2019 (COVID-19) associated with severe acute respiratory syndrome coronavirus 2 (SARS-CoV-2) infection frequently experience symptom burden post-acute infection or post-hospitalisation. We aimed to identify optimal strategies for follow-up care that may positively impact the patient's quality of life (QoL). A European Respiratory Society (ERS) Task Force convened and prioritised eight clinical questions. A targeted search of the literature defined the timeline of "long COVID" as 1–6 months post-infection and identified clinical evidence in the follow-up of patients. Studies meeting the inclusion criteria report an association of characteristics of acute infection with persistent symptoms, thromboembolic events in the follow-up period, and evaluations of pulmonary physiology and imaging. Importantly, this statement reviews QoL consequences, symptom burden, disability and home care follow-up. Overall, the evidence for follow-up care for patients with long COVID is limited.

Copyright ©The authors 2022.

This version is distributed under the terms of the Creative Commons Attribution Non-Commercial Licence 4.0. For commercial reproduction rights and permissions contact [permissions@ersnet.org](mailto:permissions@ersnet.org)

Received: 9 Aug 2021  
Accepted: 28 Dec 2021

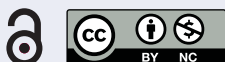

Supplement: ERJ-02174-2021.Shareable.pdf [file ERJ-02174-2021.Shareable.pdf]
